# Supplementary material for: Water from air: an overlooked source of moisture in arid and semiarid regions
Source: PubMed Central journal article supplement (PMC4561883; doi:10.1038/srep13767), 2015-09-08
Supplement: srep13767-s1.pdf [file srep13767-s1.pdf]

## Water from air: an overlooked source of moisture in arid and semiarid regions

Theresa A. McHugh, Ember M. Morrissey, Sasha C. Reed, Bruce A. Hungate, Egbert Schwartz

**a**

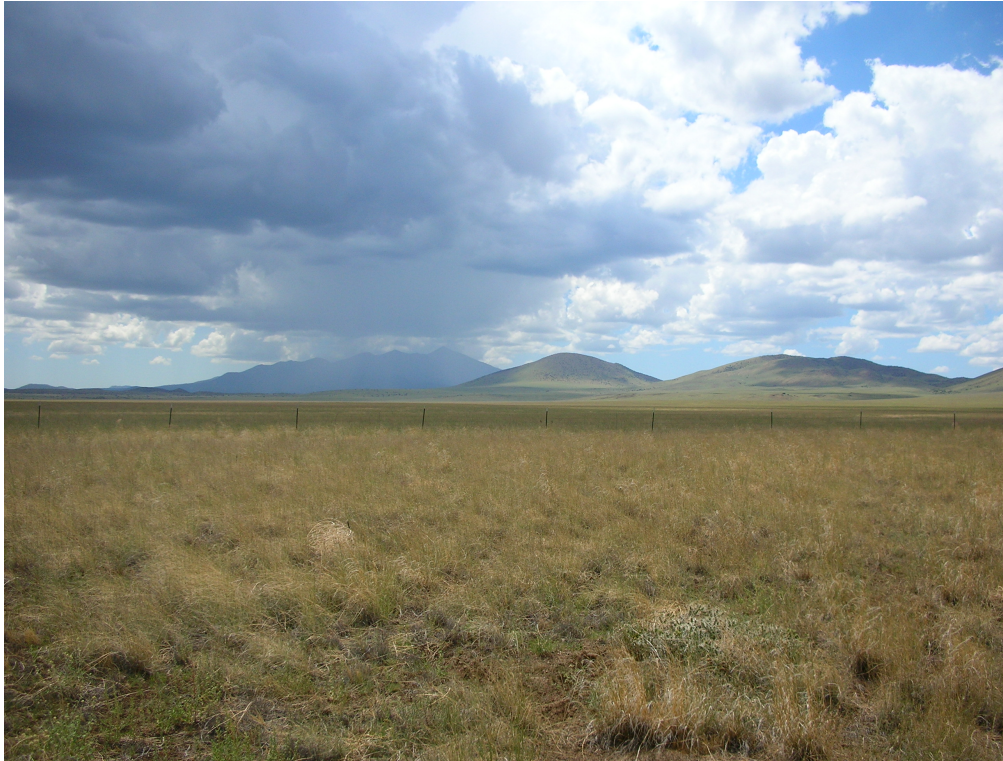

**b**

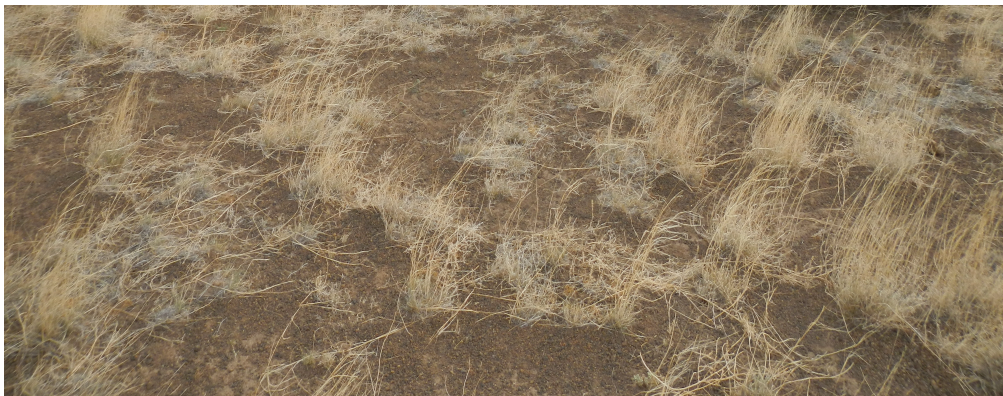

**Supplementary Figure S1 | Semiarid, high elevation grassland where the field study was conducted (a), and close-up of the soil surface during the study period when plants were dormant (b).**

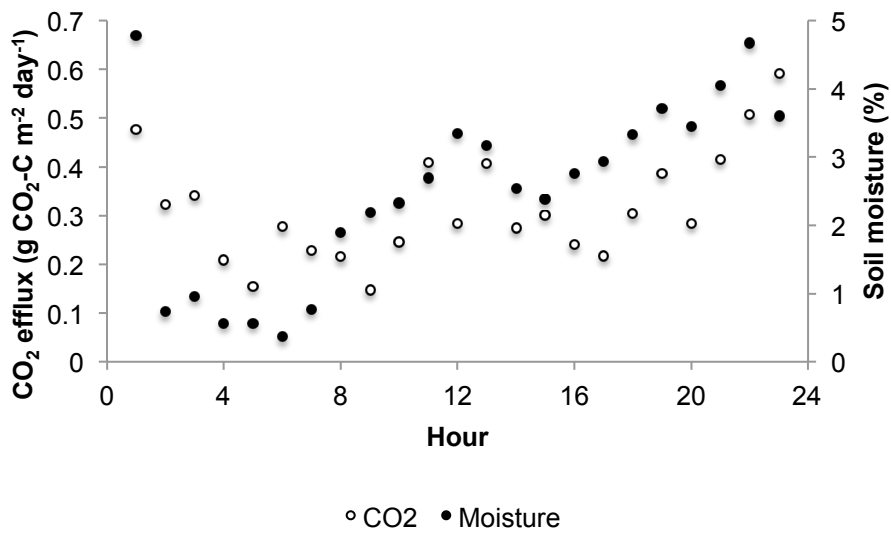

**Supplementary Figure S2 | Mean CO<sub>2</sub> efflux rates and soil moisture contents in the field during the 24-hour study.**
